# Supplementary material
Source: publisher site journal article supplement (https://www.dovepress.com/article/498009)
Supplement: Supplementary file 1 [file get_supplementary_file.php]

| **Items** | **Knowledge** | **Points** |
| --- | --- | --- |
| Q5 | “Do you know someone with hemorrhoids?” | 1 |
| Q6 | “Have you ever seen hemorrhoids? | 1 |
| Q12 | “Are hemorrhoids situated in the anus?” | 1 |
| Q13 | “Are hemorrhoids responsible of anal bleeding during defecation?” | 1 |
| Q14 | “Are hemorrhoids responsible of anal pain?” | 1 |
| Q15 | “Are hemorrhoids responsible of anal swelling?” | 1 |
| **Total** |  | 6 |
|  | **Attitudes** |  |
| Q16 | “Do you agree that hemorrhoids have an impact on eyes (eye diseases)?” | 3 |
| Q17 | “Do you agree that hemorrhoids can be treated in hospital?” | 3 |
| Q18 | “Do you agree that only traditional (indigenous) treatment can treat hemorrhoids?” | 3 |
| Q19 | “Do you agree that treatment of hemorrhoids in hospital (modern treatment) is dangerous?” | 3 |
| Q20 | “Do you agree that hemorrhoids cause infertility?” | 3 |
| Q21 | “Do you agree that hemorrhoids cause sexual dysfunction?” | 3 |
| Q22 | Do you agree that surgery is not recommended for someone with hemorrhoids?” | 3 |
| Q23 | “Do you agree that surgical treatment of hemorrhoids causes infertility?” | 3 |
| Q24 | “Do you agree that surgical treatment of hemorrhoids causes sexual dysfunction?” | 3 |
| Q31 | “Do you agree that modern medicine does not know how to treat hemorrhoids?” | 3 |
| Q32 | ” Do you agree that traditional (indigenous) treatment knows how to treat hemorrhoids?” | 3 |
| Q33 | “Do you agree that traditional (indigenous) treatment for hemorrhoids is better than modern treatment?”. | 3 |
| **Total** |  | 36 |
|  | **Practices** |  |
|  | **Practices for its own** |  |
| Q3 | “Have you been to hospital for hemorrhoids?” | 1 |
| Q4 | “Have you consult a traditional healer for hemorrhoids?” | 1 |
| Q25 | “Do you prefer a treatment in hospital (modern treatment) if you get hemorrhoids?” | 1 |
| Q26 | “Do you prefer a traditional (indigenous) treatment if you get hemorrhoids?” |
| Q27 | “Would you accept a surgical treatment if you get hemorrhoids?” | 1 |
|  |  |  |
|  | **Practices for its relatives** |  |
| Q28 | “Would you accept a treatment in hospital (modern treatment) for one of your relatives having hemorrhoids?” | 3 |
| Q29 | ” Would you accept a traditional (indigenous) treatment for one of your relatives having hemorrhoids?” |
| Q30 | ” Would you accept a surgical treatment for one of your relatives having hemorrhoids?”. | 3 |
| **Total** |  | 10 or 8 |

Supplementary Table 1: Questionnaire items and formulas

**SCORES CALCULATION**

**Knowledge:**

[(Q5+Q6 + Q12 + Q13+Q14+Q15)/6] *100

**Attitudes :**

[(Q16+Q17+Q18+Q19+Q20+Q21+Q22+Q23+Q24+Q31+Q32+Q33) /36] *100

**Practices:**

[(Q3+Q4+(Q25+Q26)/2+Q27+(Q28+Q29)/2+Q30)/10] *100 if Q1 is “yes”

[(Q25+Q26)/2+Q27+(Q28+Q29)/2+Q30)/8] *100 if Q1 is “no” [(Q3+Q4+(Q25+Q26)/2+Q27+(Q28+Q29)/2+Q30)/10] *100 if Q1 is “unknown “or “presence anal bleeding or anal prolapse”

|  | Knowledge  Mean (SD) |  | Attitudes  Mean (SD) |  | Practices  Mean (SD) |  |
| --- | --- | --- | --- | --- | --- | --- |
|  |  | p value |  | p value |  | p value |
| **Age (years)** |  | 0.01 |  | NS |  | 0.03 |
| < 30 | 44.4 (33.7) |  | 44.3 (19.0) |  | 36.3 (22.6) |  |
| ≥ 30 | 52.1 (34.5) |  | 43.1 (18.5) |  | 32.5 (21.3) |  |
| **Sex** |  | NS |  | NS |  | NS |
| Male | 51.6 (34.1) |  | 42.4 (18.7) |  | 32.5 (21.8) |  |
| Female | 47.8 (34.9) |  | 44.8 (18.5) |  | 35.1 (21.8) |  |
| **Remunerated activity** |  | 0.002 |  | <0.001 |  | NS |
| Yes | 52.6 (34.6) |  | 41.8 (18.7) |  | 32.6 (21.3) |  |
| No | 44.5 (33.6) |  | 47.0 (17.7) |  | 35.6 (22.5) |  |
| **Location of residency** |  |  |  |  |  |  |
| Urban area | 53.9 (34.7) | <0.001 | 45.4 (17.7) | <0.001 | 35.9 (21.1) | <0.001 |
| Rural area | 40.3 (31.7) |  | 38.2 (20.0) |  | 27.5 (22.5) |  |
| **Education levels** |  | NS |  | <0.001* |  | 0.03* |
| Primary school | 51 (35.6) |  | 40.0 (19.6) |  | 33.0 (23.7) |  |
| Secondary school | 52.7 (33.8) |  | 43.6 (20.2) |  | 33.2 (21.9) |  |
| University | 50.3 (35) |  | 47.5 (17.2) |  | 36.7 (22.8) |  |
| Not educated | 44.6 (33.6) |  | 39.3 (16.5) |  | 30.0 (18.1) |  |

Supplementary Table 2. Distributions and comparisons of the magnitude of knowledge, attitudes, and practices according to baseline characteristics

NS: Nonsignificant * The p value shown is derived from the Welch’s one-way ANOVA
